# Supplementary material
Source: PubMed Central journal article supplement (PMC2630092)
Supplement: 0804897106_0804897106SI.pdf [file 0804897106_0804897106SI.pdf]

# Supporting Information

Sharp et al. 10.1073/pnas.0804897106

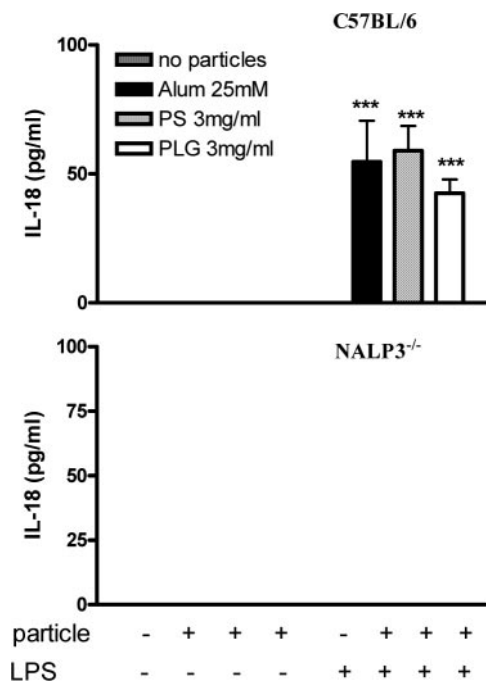

**Fig. S1.** Enhancement of IL-18 secretion by particulate adjuvants is NALP3-dependent. DCs from C57BL/6 or NALP3<sup>-/-</sup> mice were incubated with PLG or PS microparticles or alum alone or for 1 h before the addition of LPS (5 ng/ml) for 24 h. IL-18 was determined by ELISA. Particles plus LPS vs. LPS only: \*\*\*,  $P < 0.001$





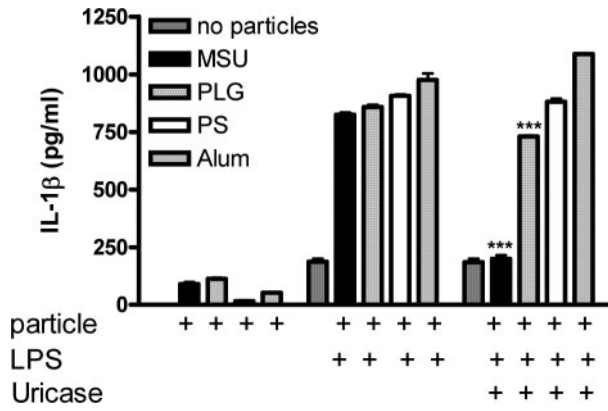

**Fig. S4.** Uric acid is not required for the enhancement of IL-1 $\beta$  secretion by particulate adjuvants. DCs from C57BL/6 mice were incubated with monosodium urate crystals or particulate adjuvants alone, or following incubation with uricase (0.1 U/mL) alone or for 1 h before the addition of LPS. IL-1 $\beta$  concentrations were determined by ELISA. Particles + LPS vs particles + LPS + uricase; \*\*\*,  $P < 0.001$ .
